# Supplementary material for: 0D and 1D dimensional structures based on the combination of polyoxometalates, transition metal coordination complexes and organic amines
Source: Royal Society of Chemistry journal article supplement (doi:10.1039/b914655e), 2010-01-01
Supplement: b914655e.pdf [file b914655e.pdf]

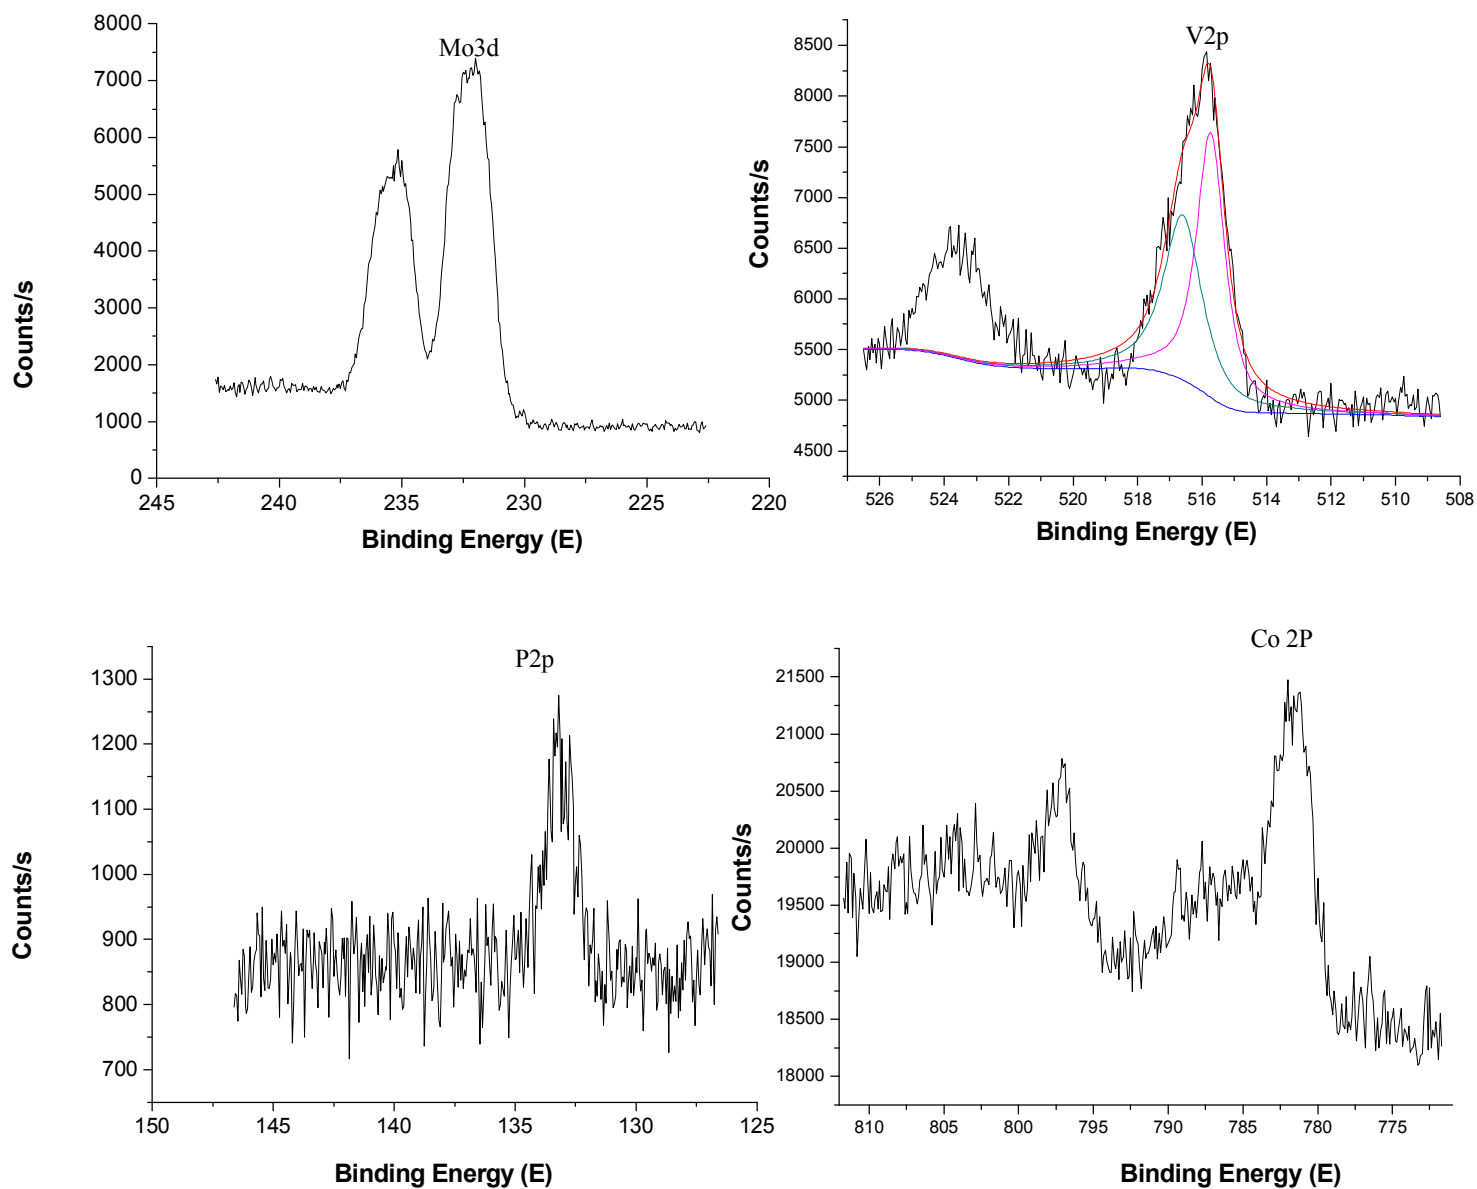

Fig. s1 The XPS spectra for compound 1.

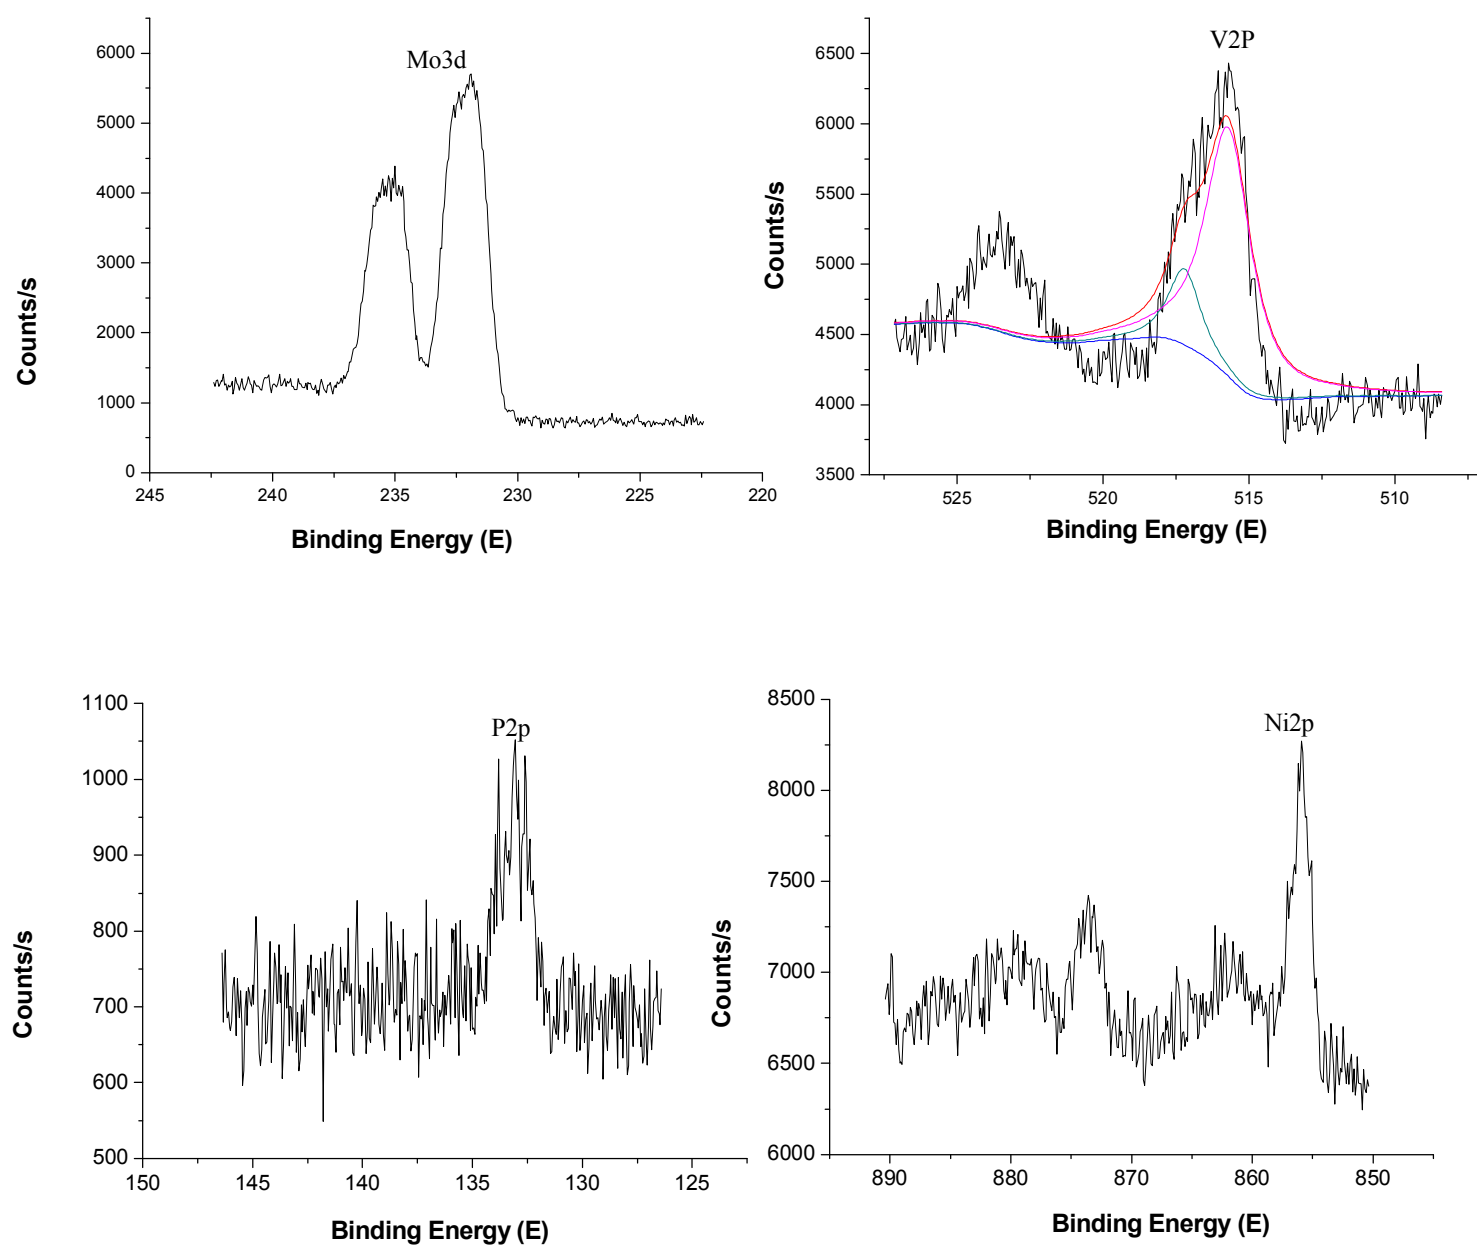

Fig. s2 The XPS spectra for compound 2.

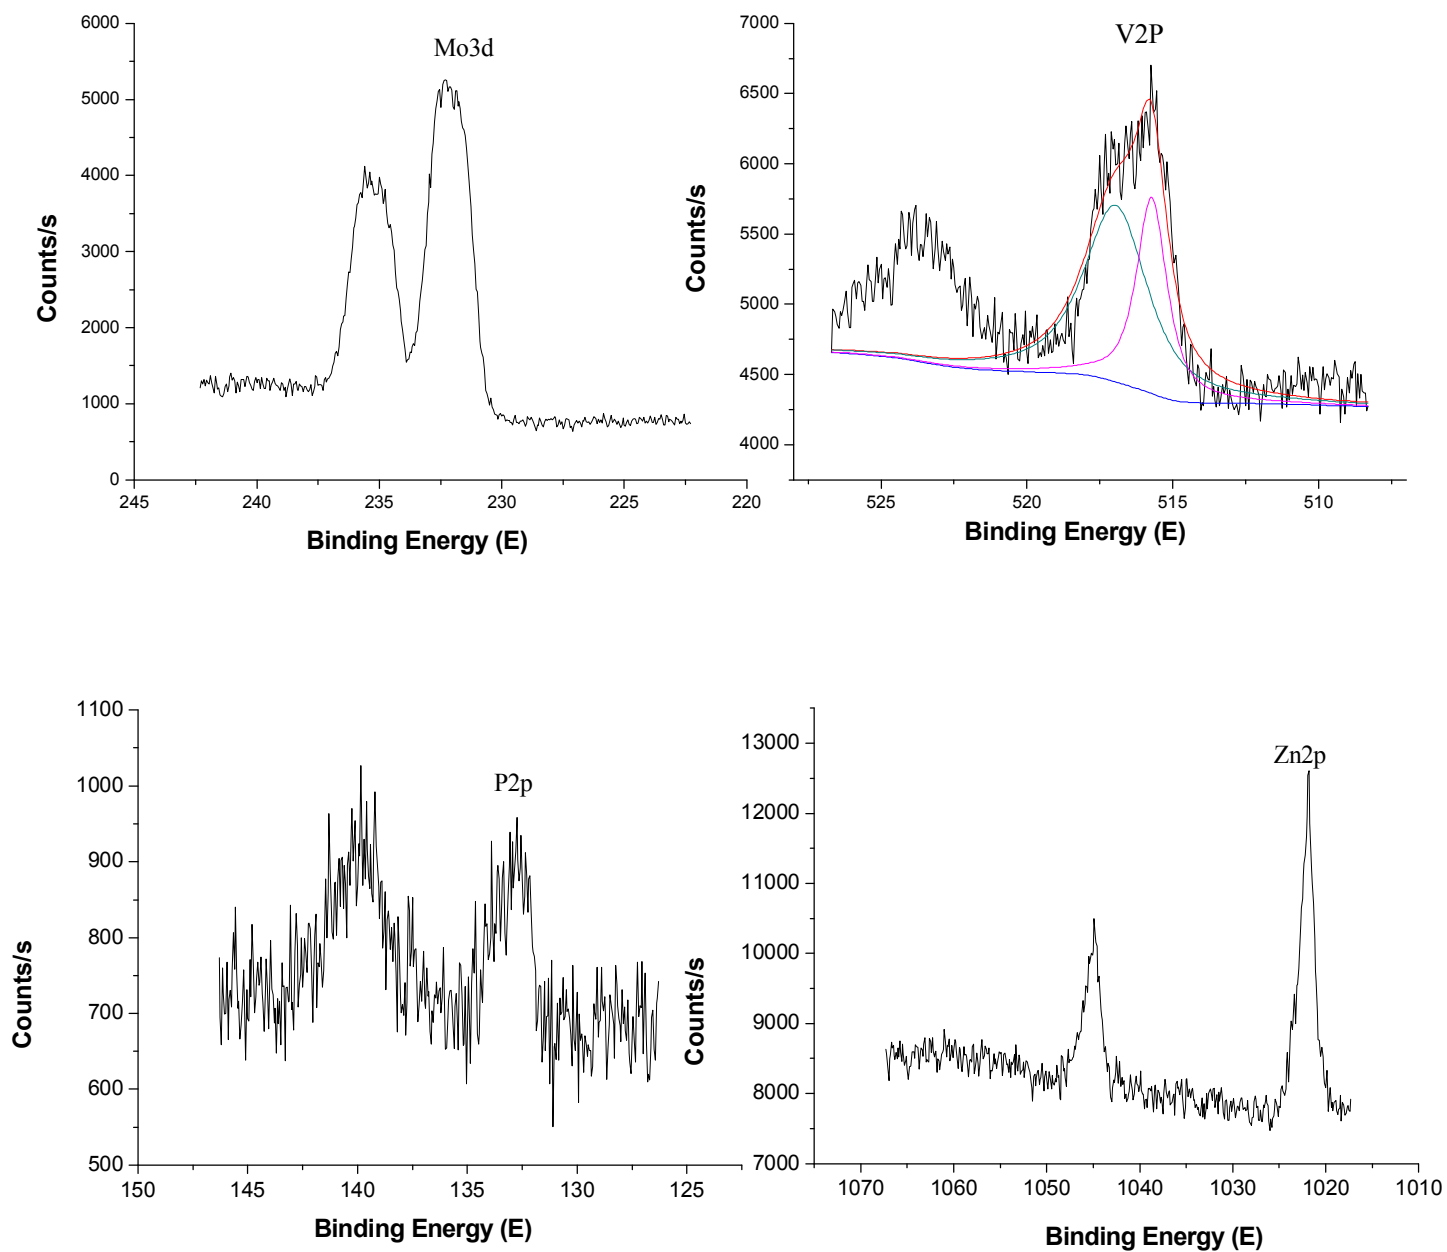

Fig. s3 The XPS spectra for compound 3.

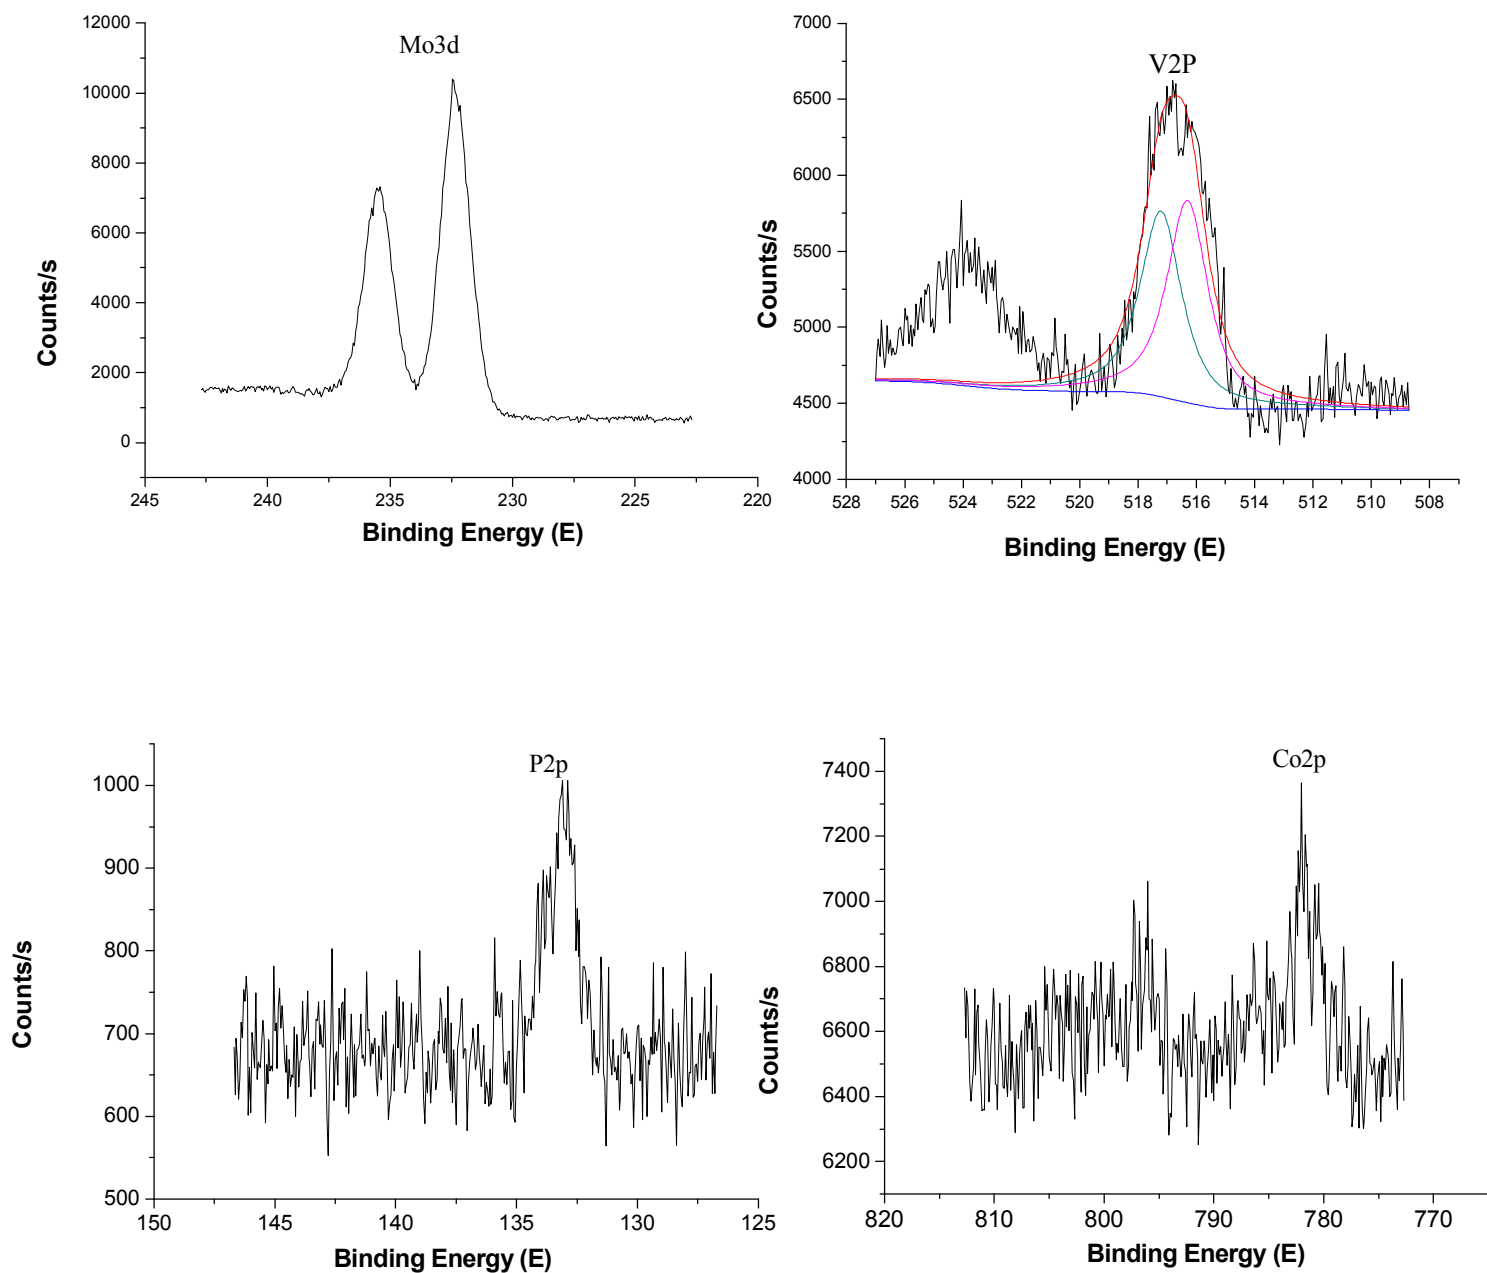

Fig. S4 The XPS spectra for compound 4.

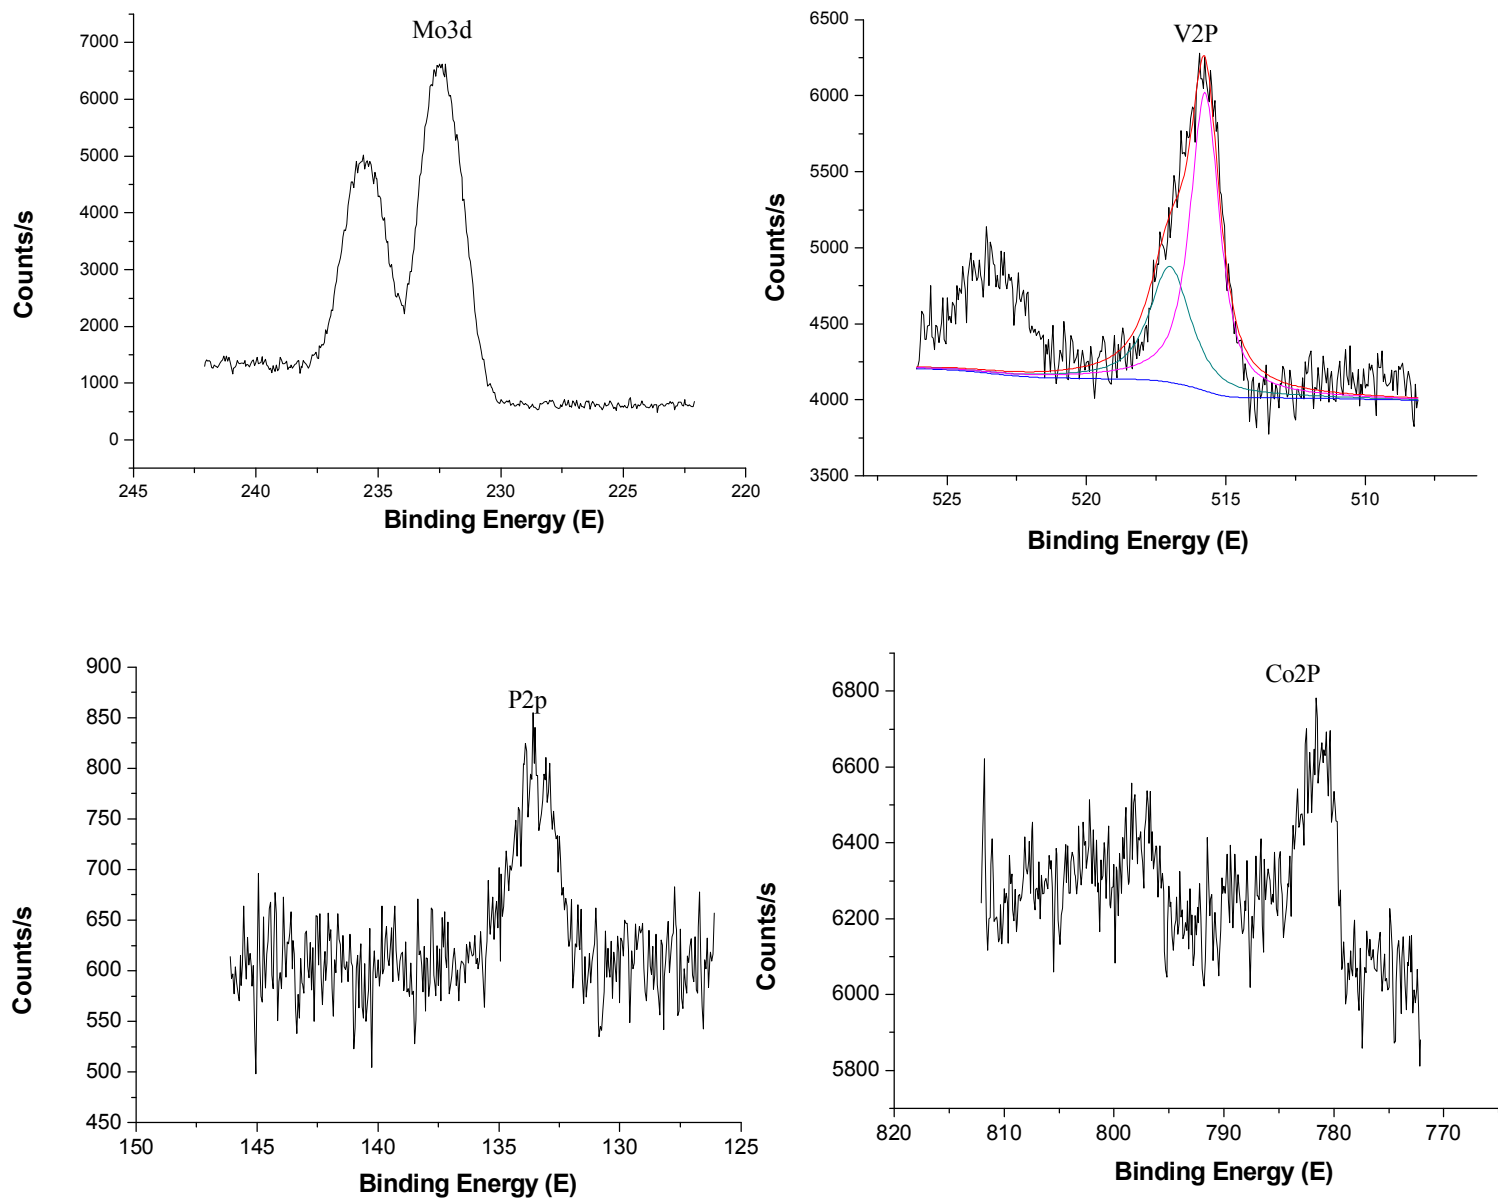

Fig. s5 The XPS spectra for compound 5.

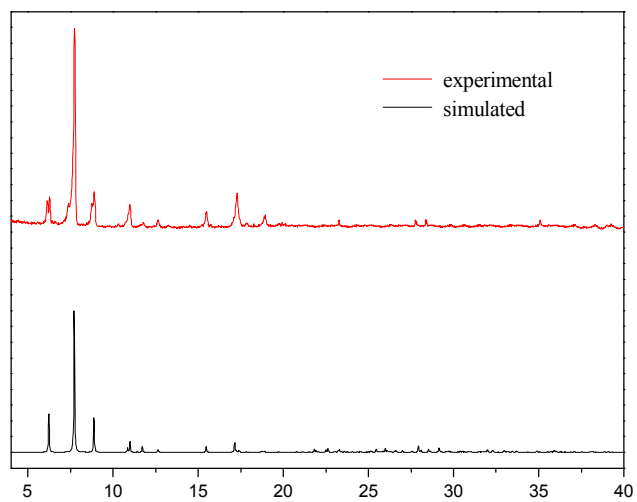

Fig. s6 the experimental and simulated XRD pattern for **1**.

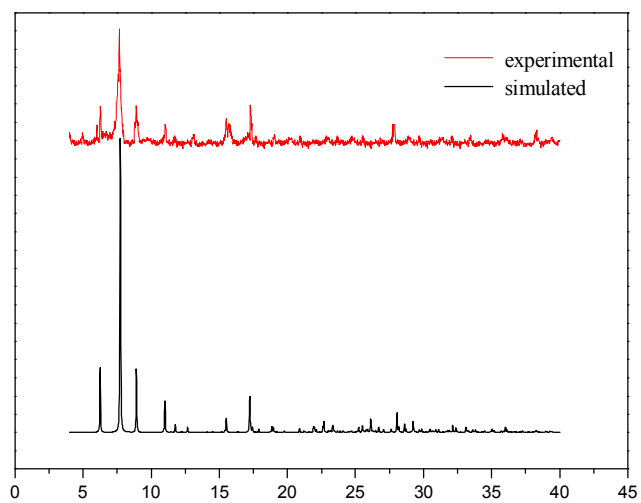

Fig. s7 the experimental and simulated XRD pattern for **2**.

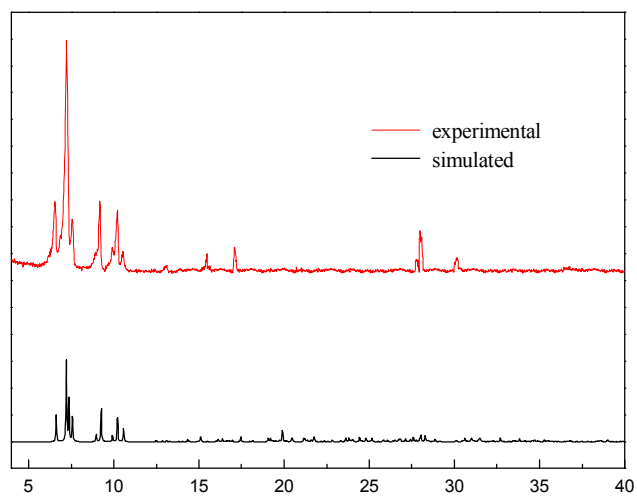

Fig. s8 the experimental and simulated XRD pattern for **3**.



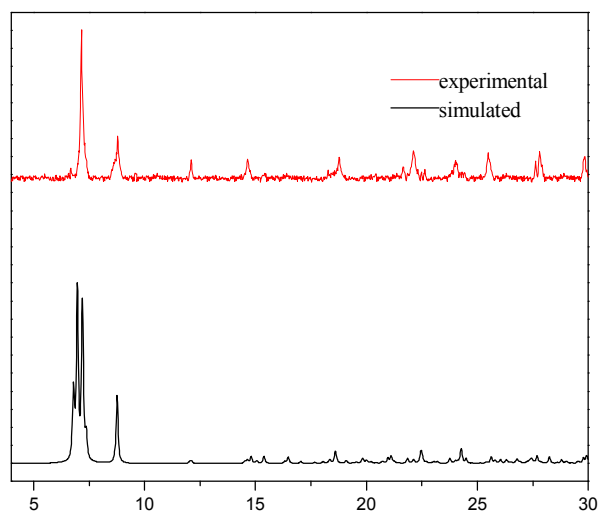

Fig. s9 the experimental and simulated XRD pattern for 4.

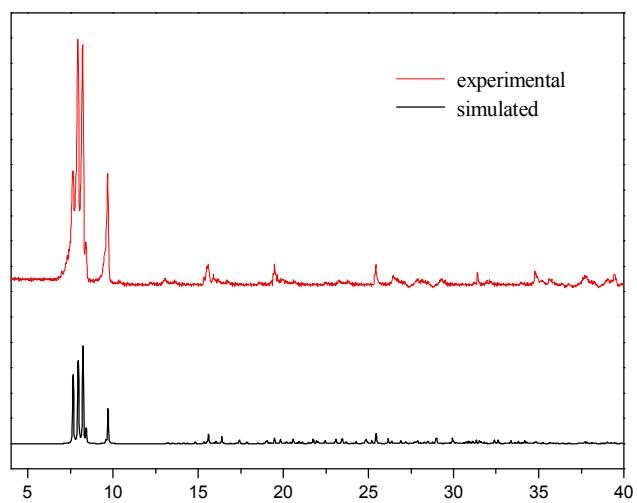

Fig. s10 the experimental and simulated XRD pattern for **5**.
